# Supplementary material for: C-5 Hydroxyethyl and Hydroxypropyl Acyclonucleosides as Substrates for Thymidine Kinase of Herpes Simplex Virus Type 1 (HSV-1 TK): Syntheses and Biological Evaluation
Source: Molecules. 2013 May 2;18(5):5104–24. doi: 10.3390/molecules18055104 (PMC6270122; doi:10.3390/molecules18055104)
Supplement: Supplementary file 1 [file molecules-18-05104-s001.pdf]

# Supplementary Materials

## 1. Phosphorylation Assay of Compound 19

**Figure S1.** HPLC chromatograms of the reaction mixture of compound **19**, the enzyme (HSV-1 TK or hTK) and ATP.

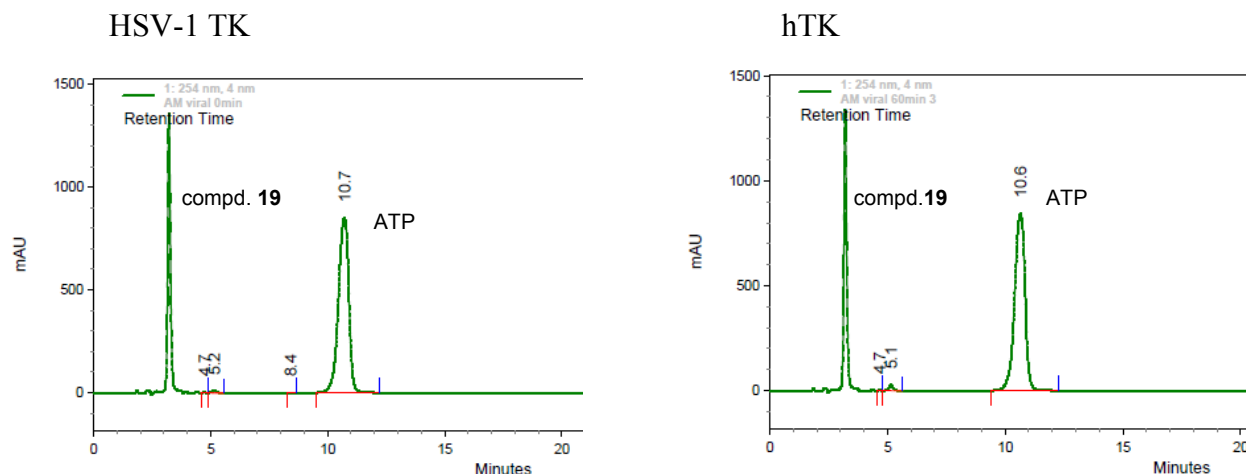

Formation of a new peak corresponding to monophosphated derivative of **19** was not detected. Compound **19** is not a substrate for HSV-1 TK and human thymidine kinase (hTK).

## 2. Phosphorylation Assay of Compound 21

**Figure S2.** HPLC chromatograms of the reaction mixture of compound **21**, the enzyme (HSV-1 TK or hTK) and ATP.

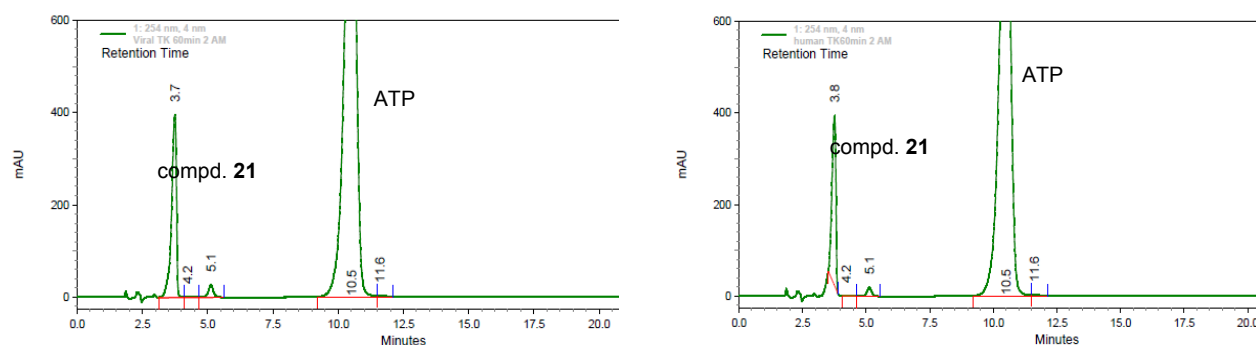

Formation of a new peak corresponding to monophosphated derivative of **21** was not detected. Compound **21** is not a substrate for HSV-1 TK and hTK.

### 3. Phosphorylation Assay of Compound 23

**Figure S3.** HPLC chromatograms of the reaction mixture of compound **23**, the enzyme (HSV-1 TK or hTK) and ATP.

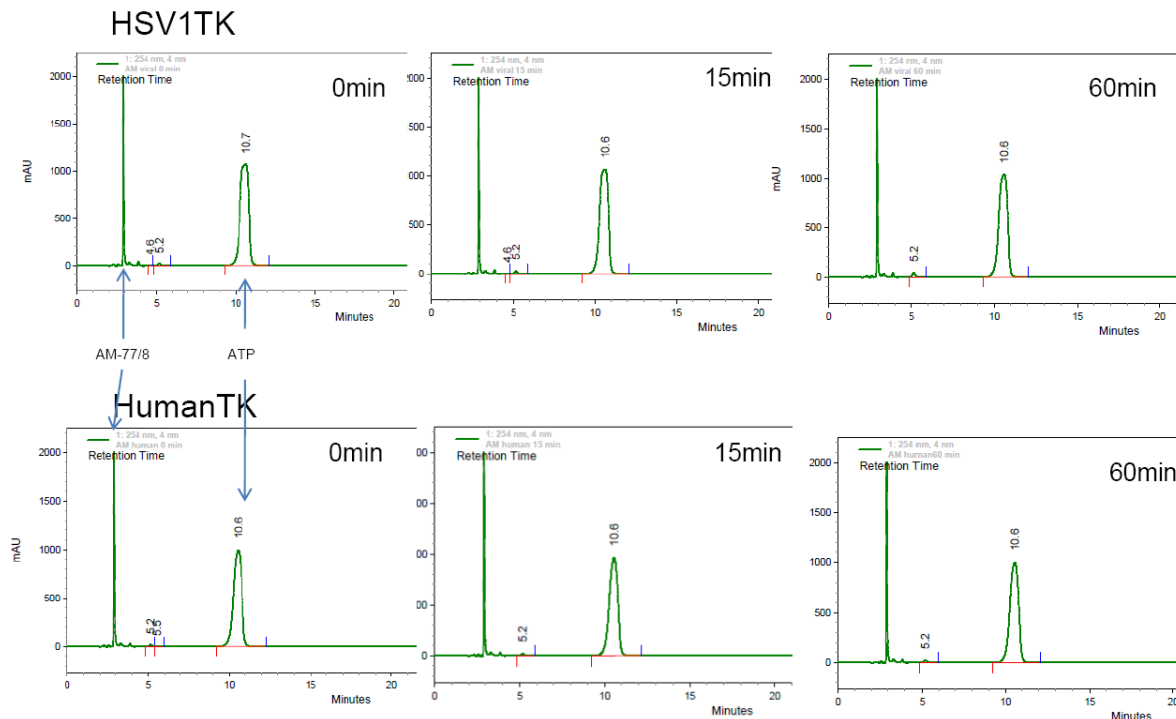

Formation of a new peak which would correspond to monophosphated derivative of **23** was not detected suggesting that **23** is not a substrate for HSV1 TK and hTK.

### 4. Phosphorylation Assays of dT and Compound 31

**Figure S4.** HPLC chromatograms of dT (1 mM) during incubation with HSV-1 TK and ATP, and blank reactions (no enzyme or no dT). Reactions were stopped after (a) 30 min, (b) 60 min, (c) 90 min.

(a) at 30 min

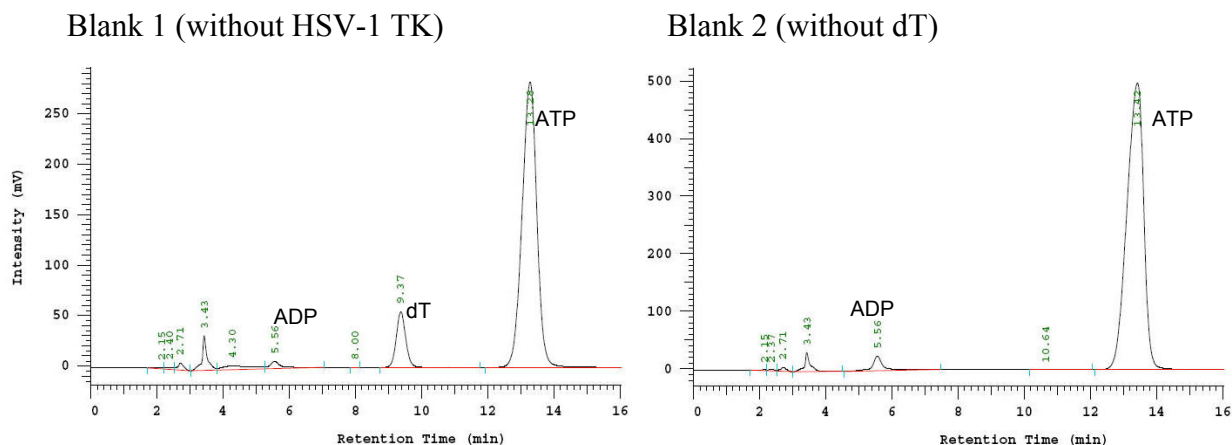

Reaction at 30 min

Figure S4. Cont.

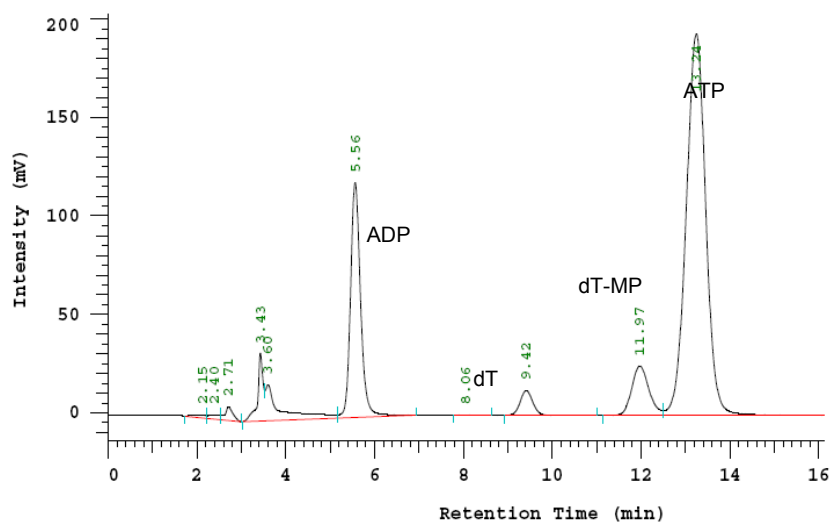

(b) at 60 min

Blank 1 (without HSV-1 TK)

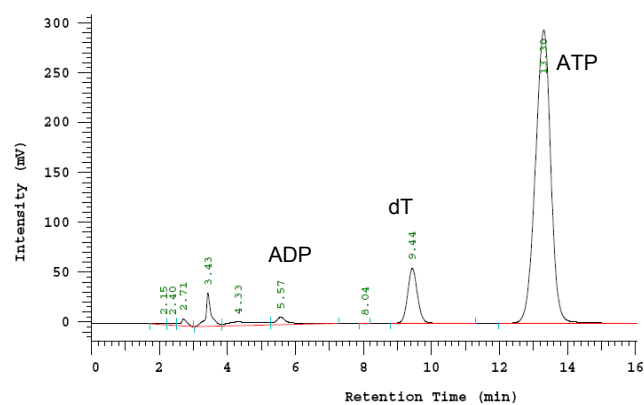

Blank 2 (without dT)

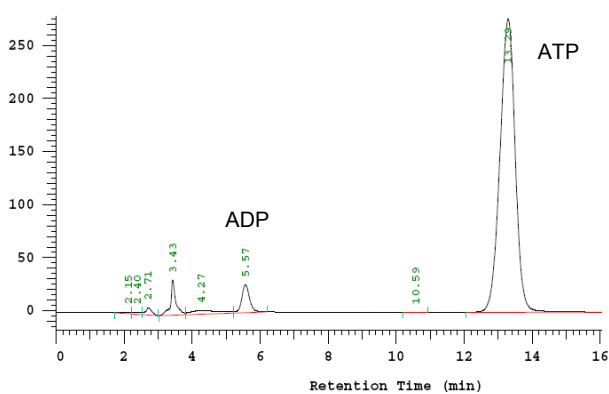

Reaction at 60 min

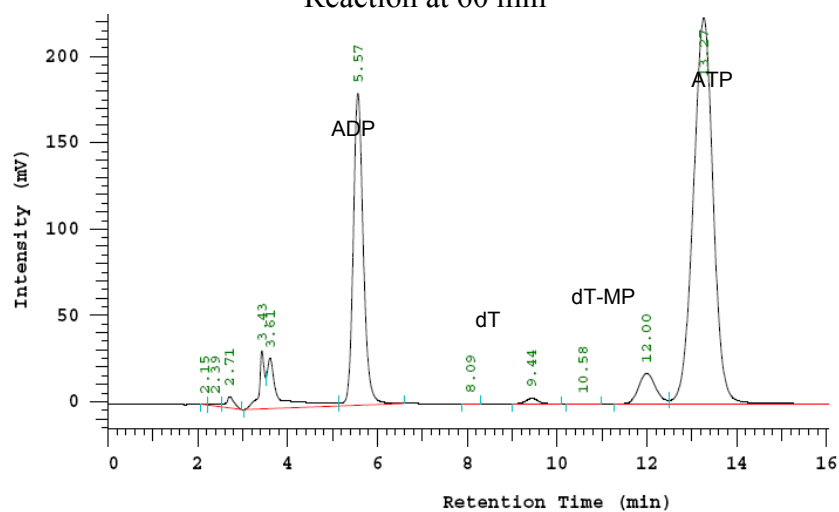

Figure S4. Cont.

(c) at 90 min

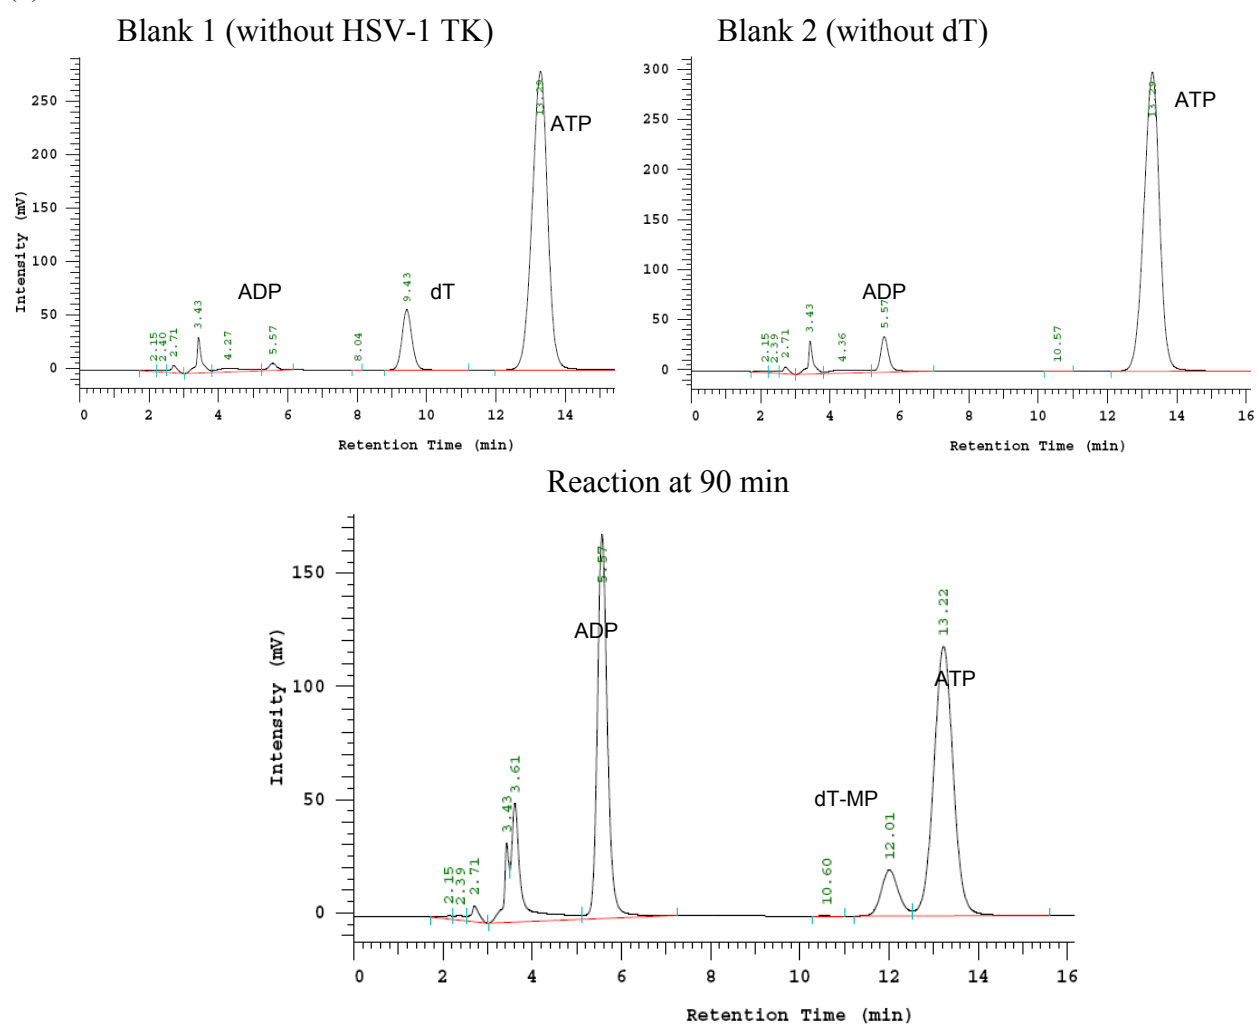

**Figure S5.** HPLC chromatograms of the reaction mixture of compound **31**, HSV-1 TK and ATP, and blank reactions (no enzyme or no compound **31**). Reactions were stopped at (a) 30 min, (b) 60 min, (c) 90 min. Elution with mobile phase 0.2 M  $\text{NaH}_2\text{PO}_4$ , 25 mM tetrabutylammonium hydrogen sulfate and 1 % methanol at flow rate 1 mL/min and column LiCrospher® 100 RP-18 endcapped, (5  $\mu\text{m}$ ) did not allow an efficient separation of compound **31** and ADP. Blank reactions were run concomitantly with reaction experiments to account for background ATP hydrolysis.

(a) at 30 min

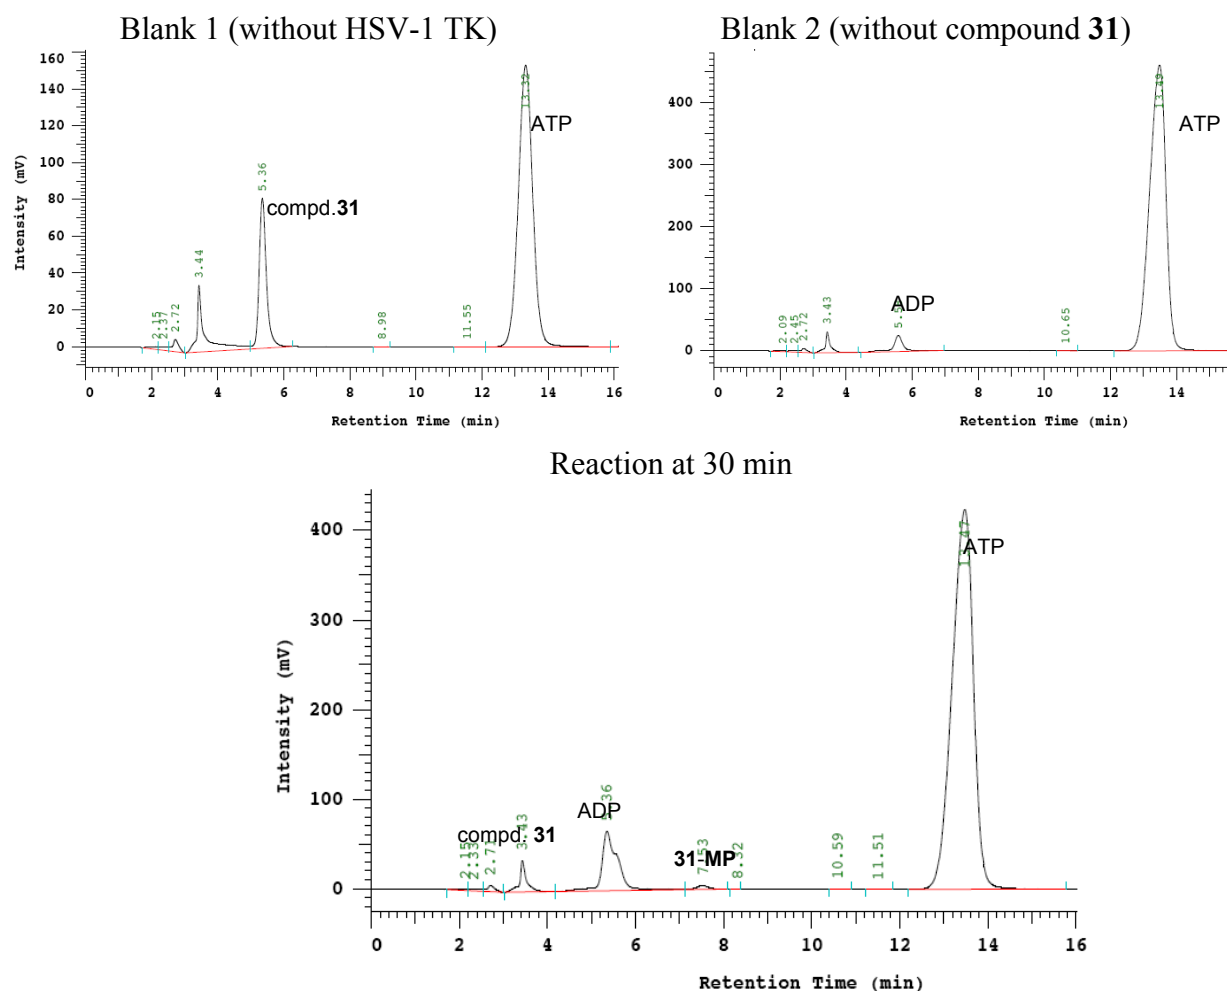

(b) at 60 min

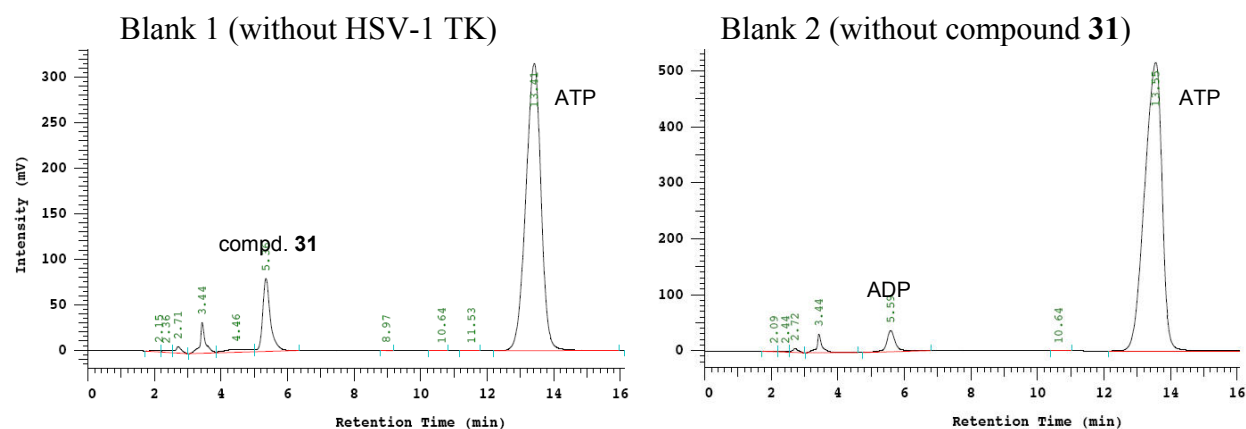

Figure S5. Cont.

Reaction at 60 min

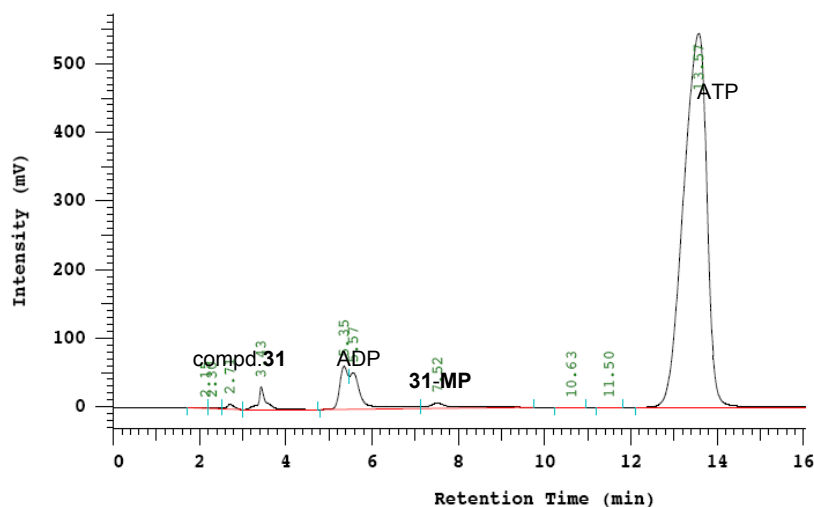

(c) at 90 min

Blank 1 (without HSV-1 TK)

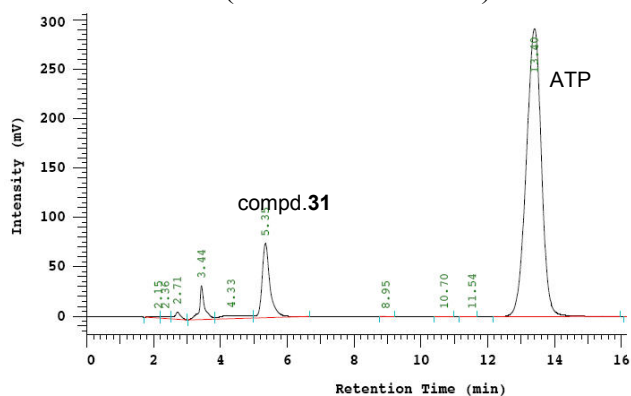

Blank 2 (without compound 31)

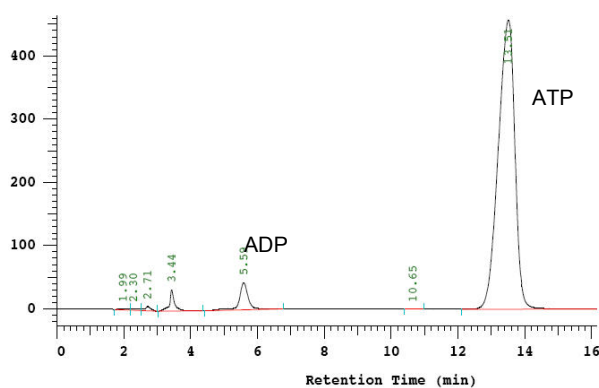

Reaction at 90 min

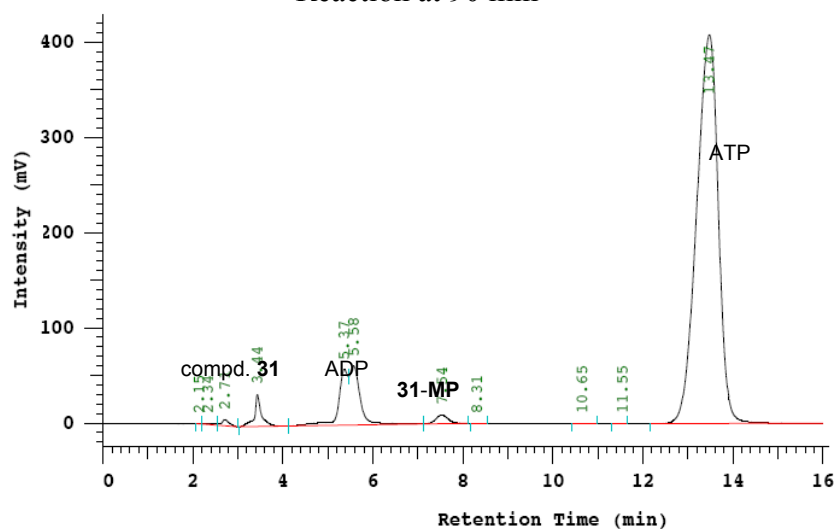

Formation of new peak corresponding to the monophosphated derivative of **31** (**31-MP**) is observed. Increase of peaks that can be ascribed to both **31-MP** and ADP can be seen during time, as well as decrease of the peak corresponding to compound **31**.

## 5. Phosphorylation Assay of Fluorinated Derivative of 31 (F-31)

**Figure S6.** HPLC chromatograms of the reaction mixture of **F-31**, HSV-1 TK and ATP, and blank reactions (no enzyme or no **F-31**). Reactions were stopped at (a) 30 min, (b) 60 min, (c) 90 min.

(a) at 30 min

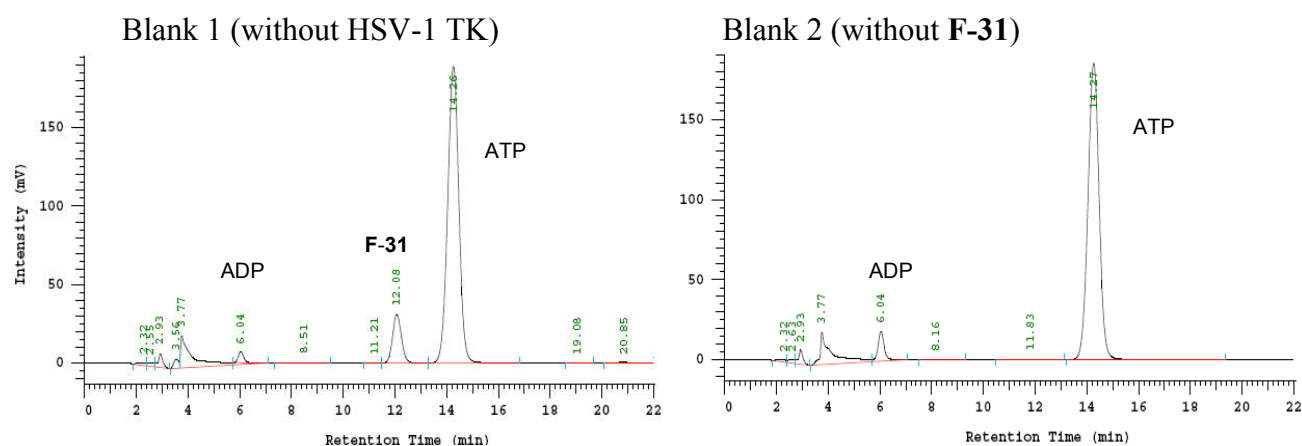

Reaction at 30 min

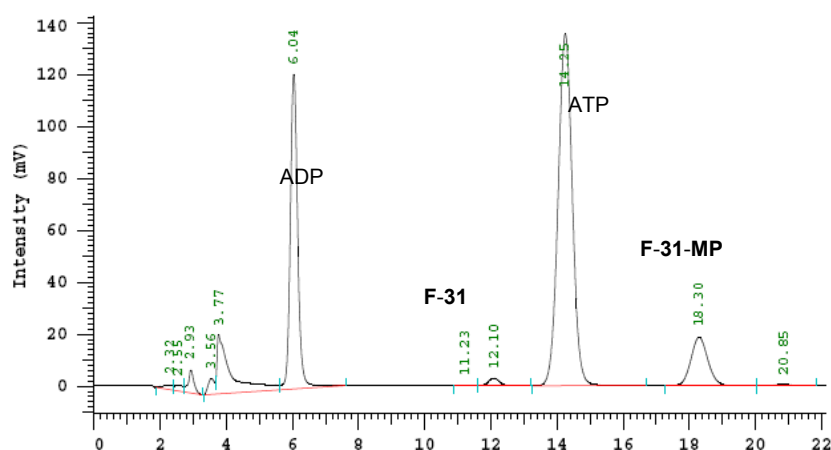

(b) at 60 min

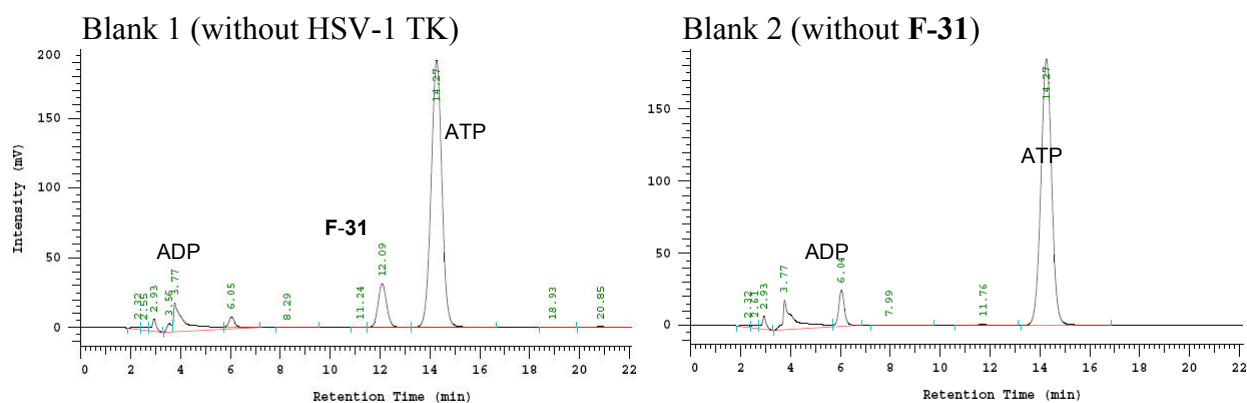

Reaction at 60 min

Figure S6. Cont.

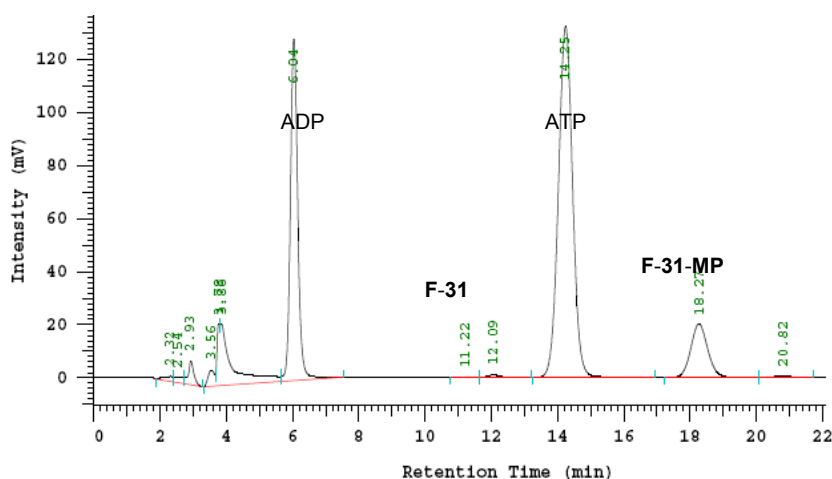

(c) at 90 min

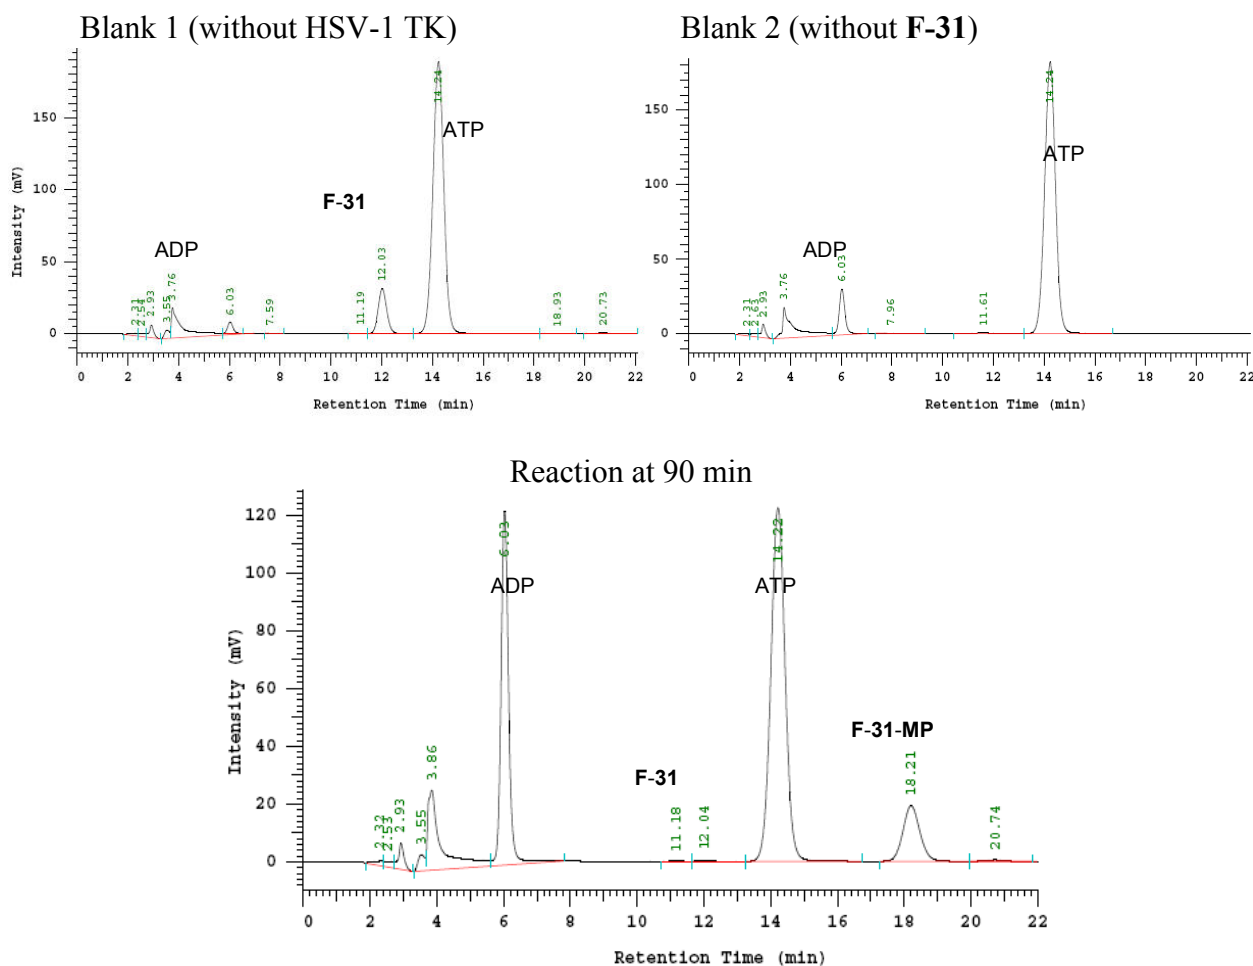

Formation of new peak corresponding to the monophosphated derivative of **F-31** (**F-31-MP**) is observed. Increase of peaks that can be ascribed to both **F-31-MP** and ADP can be observed during incubation, as well as decrease of the peak corresponding to **F-31**. Compound **F-31** is almost entirely converted to monophosphate **F-31-MP** during 90 min of incubation.
